# Supplementary material
Source: ML conference proceedings conference paper supplement (https://openaccess.thecvf.com/content/CVPR2023/html/Zhuang_GKEAL_Gaussian_Kernel_CVPR_2023_paper.html)
Supplement: Supplementary file 1 [file Zhuang_GKEAL_Gaussian_Kernel_CVPR_2023_supplemental.pdf]

# Supplementary Material for GKEAL: Gaussian Kernel Embedded Analytic Learning for Few-shot Class Incremental Task

Huiping Zhuang<sup>1\*</sup>, Zhenyu Weng<sup>2</sup>, Run He<sup>1</sup>, Zhiping Lin<sup>2</sup>, Ziqian Zeng<sup>1</sup>

<sup>1</sup>Shien-Ming Wu School of Intelligent Engineering, South China University of Technology, China

<sup>2</sup>School of Electrical and Electronic Engineering, Nanyang Technological University, Singapore

\*corresponding: hpzhuang@scut.edu.cn

## 1. Proof

*Proof.* The problem is formulated as

$$\operatorname{argmin}_{\mathbf{W}_{\text{FCN}}} \left\| \mathbf{Y}_{0:k}^{\text{train}} - \mathbf{X}_{0:k}^{\text{train}} \mathbf{W}_{\text{FCN}}^{(k)} \right\|_F^2 + \gamma \left\| \mathbf{W}_{\text{FCN}}^{(k)} \right\|_F^2$$

with a solution

$$\hat{\mathbf{W}}_{\text{FCN}}^{(k)} = (\mathbf{X}_{0:k}^{(\text{ke})\text{T}} \mathbf{X}_{0:k}^{(\text{ke})} + \gamma \mathbf{I})^{-1} \mathbf{X}_{0:k}^{(\text{ke})\text{T}} \mathbf{Y}_{0:k}^{\text{train}}. \quad (\text{a})$$

We break (a) into

$$\begin{aligned} \hat{\mathbf{W}}_{\text{FCN}}^{(k)} &= (\mathbf{X}_{0:k-1}^{(\text{ke})\text{T}} \mathbf{X}_{0:k-1}^{(\text{ke})} + \gamma \mathbf{I} + \mathbf{X}_k^{(\text{ke})\text{T}} \mathbf{X}_k^{(\text{ke})})^{-1} \begin{bmatrix} \mathbf{X}_{0:k-1}^{(\text{ke})\text{T}} & \mathbf{X}_k^{(\text{ke})\text{T}} \end{bmatrix} \begin{bmatrix} \mathbf{Y}_{0:k-1}^{\text{train}} & \mathbf{0} \\ \mathbf{0} & \mathbf{Y}_k^{\text{train}} \end{bmatrix} \\ &= (\mathbf{X}_{0:k-1}^{(\text{ke})\text{T}} \mathbf{X}_{0:k-1}^{(\text{ke})} + \gamma \mathbf{I} + \mathbf{X}_k^{(\text{ke})\text{T}} \mathbf{X}_k^{(\text{ke})})^{-1} \begin{bmatrix} \mathbf{X}_{0:k-1}^{(\text{ke})\text{T}} \mathbf{Y}_{0:k-1}^{\text{train}} & \mathbf{X}_k^{(\text{ke})\text{T}} \mathbf{Y}_k^{\text{train}} \end{bmatrix}. \end{aligned} \quad (\text{b})$$

According to Woodbury matrix identity, we have

$$\mathbf{R}_k = \mathbf{R}_{k-1} - \mathbf{R}_{k-1} \mathbf{X}_k^{(\text{fe})\text{T}} (\mathbf{I} + \mathbf{X}_k^{(\text{fe})} \mathbf{R}_{k-1} \mathbf{X}_k^{(\text{fe})\text{T}})^{-1} \mathbf{X}_k^{(\text{fe})} \mathbf{R}_{k-1}$$

and (b) can be written as

$$\hat{\mathbf{W}}_{\text{FCN}}^{(k)} = \begin{bmatrix} \underbrace{\mathbf{R}_k \mathbf{X}_{0:k-1}^{(\text{ke})\text{T}} \mathbf{Y}_{0:k-1}^{\text{train}}}_{\mathbf{G}_k} & \mathbf{R}_k \mathbf{X}_k^{(\text{ke})\text{T}} \mathbf{Y}_k^{\text{train}} \end{bmatrix}. \quad (\text{c})$$

This obviously violates the incremental setting as  $\hat{\mathbf{W}}_{\text{FCN}}^{(k)}$  involves historical data  $\mathcal{D}_{0:k-1}^{\text{train}}$ . To avoid the violation, we connect historical data using the trained weight  $\hat{\mathbf{W}}_{\text{FCN}}^{(k-1)}$ , which rewrites  $\mathbf{G}_k$  as

$$\begin{aligned} \mathbf{G}_k &= \hat{\mathbf{W}}_{\text{FCN}}^{k-1} - \mathbf{R}_{k-1} \mathbf{X}_k^{(\text{fe})\text{T}} (\mathbf{I} + \mathbf{X}_k^{(\text{fe})} \mathbf{R}_{k-1} \mathbf{X}_k^{(\text{fe})\text{T}})^{-1} \mathbf{X}_k^{(\text{fe})} \hat{\mathbf{W}}_{\text{FCN}}^{k-1} \\ &= \hat{\mathbf{W}}_{\text{FCN}}^{k-1} - \mathbf{R}_{k-1} \mathbf{X}_k^{(\text{fe})\text{T}} \left( \mathbf{I} - (\mathbf{I} + \mathbf{X}_k^{(\text{fe})} \mathbf{R}_{k-1} \mathbf{X}_k^{(\text{fe})\text{T}})^{-1} \mathbf{X}_k^{(\text{fe})} \mathbf{R}_{k-1} \mathbf{X}_k^{(\text{fe})\text{T}} \right) \mathbf{X}_k^{(\text{fe})} \hat{\mathbf{W}}_{\text{FCN}}^{k-1} \\ &= \hat{\mathbf{W}}_{\text{FCN}}^{k-1} - \left( \mathbf{R}_{k-1} - \mathbf{R}_{k-1} \mathbf{X}_k^{(\text{fe})\text{T}} (\mathbf{I} + \mathbf{X}_k^{(\text{fe})} \mathbf{R}_{k-1} \mathbf{X}_k^{(\text{fe})\text{T}})^{-1} \mathbf{X}_k^{(\text{fe})} \mathbf{R}_{k-1} \right) \mathbf{X}_k^{(\text{fe})\text{T}} \mathbf{X}_k^{(\text{fe})} \hat{\mathbf{W}}_{\text{FCN}}^{k-1} \\ &= \hat{\mathbf{W}}_{\text{FCN}}^{k-1} - \mathbf{R}_k \mathbf{X}_k^{(\text{fe})\text{T}} \mathbf{X}_k^{(\text{fe})} \hat{\mathbf{W}}_{\text{FCN}}^{k-1}. \end{aligned} \quad (\text{d})$$

Hence, (c) can be written as

$$\hat{\mathbf{W}}_{\text{FCN}}^{(k)} = \begin{bmatrix} \underbrace{\hat{\mathbf{W}}_{\text{FCN}}^{k-1} - \mathbf{R}_k \mathbf{X}_k^{(\text{fe})\text{T}} \mathbf{X}_k^{(\text{fe})} \hat{\mathbf{W}}_{\text{FCN}}^{k-1}}_{\text{old tasks}} & \underbrace{\mathbf{R}_k \mathbf{X}_k^{(\text{ke})\text{T}} \mathbf{Y}_k^{\text{train}}}_{\text{new tasks}} \end{bmatrix}. \quad (\text{e})$$

□
